# Supplementary material
Source: publisher figshare collection journal article supplement (https://acs.figshare.com/ndownloader/files/5175382)
Supplement: Supplementary file 1 [file 5175382]

data_JA0391412
_audit_creation_date  2003-11-04
_audit_creation_method  'Converted from *.lst using lst2cif'

 
# TITLE AND AUTHOR LIST
 
_publ_section_title
'Structual and electronic characterizations of two isomers of Ce@C82'
 
# The loop structure below should contain the names and addresses of all
# authors, in the required order of publication. Repeat as necessary.
 
loop_
 _publ_author_name
 'Yoshie Rikiishi'
 'Yoshihiro Kubozono'
 'Tomoko Hosokawa'
 'Kana Shibata'
 'Yusuke Haruyama'
 'Yasuhiro Takabayashi' 
 'Akihiko Fujiwara'
 'Shinichiro Kobayashi'
 'Satoshi Mori'
 'Yoshihiro Iwasa'

loop_
 _publ_author_address
 'Department of Chemistry, Okayama University, Okayama 700-8530, Japan'
 'CREST, Japan Science and Technology Corportation, Kawaguchi 322-0012, Japan'
 'Japan Advanced Institute of Science and Technology, Ishikawa 932-1292, Japan'
 'Institute for Materials Research, Tohoku University, Sendai 980-8577, Japan'

# CRYSTAL DATA
 
#----------------------------------------------------------------------
data_RIETAN_phase_1
 
_pd_block_id
      '2003-11-04|PHASE_01|..creator_name..|..instr_name..'
 
_pd_phase_name                         'Ce@C82 isomer1 (Figure 1(d))'
_cell_length_a                         15.690(9)       
_cell_angle_alpha                      90.0                
_cell_angle_beta                       90.0                
_cell_angle_gamma                      90.0                
_cell_volume                           3862(4)     
_cell_formula_units                    4
_symmetry_cell_setting                 cubic          
_symmetry_space_group_name_H-M         'P a -3'
_symmetry_Int_Tables_number            205
 
loop_
   _symmetry_equiv_pos_site_id
   _symmetry_equiv_pos_as_xyz
     1   x,y,z
     2   -x+1/2,-y,z+1/2
     3   -x,y+1/2,-z+1/2
     4   x+1/2,-y+1/2,-z
     5   z,x,y
     6   z+1/2,-x+1/2,-y
     7   -z+1/2,-x,y+1/2
     8   -z,x+1/2,-y+1/2
     9   y,z,x
    10   -y,z+1/2,-x+1/2
    11   y+1/2,-z+1/2,-x
    12   -y+1/2,-z,x+1/2
    13   -x,-y,-z
    14   x+1/2,y,-z+1/2
    15   x,-y+1/2,z+1/2
    16   -x+1/2,y+1/2,z
    17   -z,-x,-y
    18   -z+1/2,x+1/2,y
    19   z+1/2,x,-y+1/2
    20   z,-x+1/2,y+1/2
    21   -y,-z,-x
    22   y,-z+1/2,x+1/2
    23   -y+1/2,z+1/2,x
    24   y+1/2,z,-x+1/2
 
loop_
 _atom_type_scat_source
 'C'  'C'   0.003   0.002 
 'International Tables Vol C Tables 4.2.6.8 and 6.1.1.4'
 'Ce'  'Ce'   -0.433   3.238 
 'International Tables Vol C Tables 4.2.6.8 and 6.1.1.4'

loop_
   _atom_site_label
   _atom_site_symmetry_multiplicity
   _atom_site_occupancy
   _atom_site_fract_x
   _atom_site_fract_y
   _atom_site_fract_z
   _atom_site_thermal_displace_type
   _atom_site_B_iso_or_equiv
   _atom_type_symbol
   C1         24  0.1667    0.23509   -0.0164    -0.12421   Biso 2.0        C
   C2         24  0.1667    0.25734   -0.04154   -0.0414    Biso 2.0        C
   C3         24  0.1667    0.26371    0.02329    0.02285   Biso 2.0        C
   C4         24  0.1667    0.23504   -0.12428   -0.01559   Biso 2.0        C
   C5         24  0.1667    0.18698   -0.17785   -0.06897   Biso 2.0        C
   C6         24  0.1667    0.15679   -0.14956   -0.14862   Biso 2.0        C
   C7         24  0.1667    0.18707   -0.07023   -0.1775    Biso 2.0        C
   C8         24  0.1667    0.21067   -0.14144    0.07243   Biso 2.0        C
   C9         24  0.1667    0.21075   -0.07568    0.13382   Biso 2.0        C
   C10        24  0.1667    0.24127    0.00595    0.10895   Biso 2.0        C
   C11        24  0.1667    0.14883   -0.07938    0.19861   Biso 2.0        C
   C12        24  0.1667    0.05753   -0.25774   -0.04091   Biso 2.0        C
   C13        24  0.1667    0.13528   -0.23091   -0.01453   Biso 2.0        C
   C14        24  0.1667    0.14705   -0.20394    0.07242   Biso 2.0        C
   C15        24  0.1667    0.07688   -0.19967    0.12978   Biso 2.0        C
   C16        24  0.1667    0.08268   -0.14081    0.19565   Biso 2.0        C
   C17        24  0.1667    0.02613   -0.12578   -0.23252   Biso 2.0        C
   C18        24  0.1667    0.07313   -0.17828   -0.17712   Biso 2.0        C
   C19        24  0.1667    0.02605   -0.23319   -0.12416   Biso 2.0        C
   C20        24  0.1667    0.11535   -0.00353    0.23618   Biso 2.0        C
   C21        24  0.1667    0.14133    0.07762    0.20669   Biso 2.0        C
   C22        24  0.1667    0.20651    0.08099    0.1445    Biso 2.0        C
   C23        24  0.1667    0.08063    0.14432    0.20729   Biso 2.0        C
   C24        24  0.1667    0.02822   -0.01915    0.25841   Biso 2.0        C
   C25        24  0.1667   -0.11739    0.02303    0.23531   Biso 2.0        C
   C26        24  0.1667   -0.03302    0.04631    0.25498   Biso 2.0        C
   C27        24  0.1667   -0.00506    0.12947    0.23145   Biso 2.0        C
   C28        24  0.1667   -0.01334   -0.25948    0.01787   Biso 2.0        C
   C29        24  0.1667   -0.00725   -0.22564    0.10033   Biso 2.0        C
   C30        24  0.1667   -0.08254   -0.18797    0.13767   Biso 2.0        C
   C31        24  0.1667   -0.07385   -0.12426    0.20453   Biso 2.0        C
   C32        24  0.1667    0.00736   -0.1031     0.23302   Biso 2.0        C
   C33        24  0.1667   -0.13809   -0.06115    0.21399   Biso 2.0        C
   C34        24  0.1667    0.08065    0.20835    0.14233   Biso 2.0        C
   C35        24  0.1667    0.14153    0.20738    0.07586   Biso 2.0        C
   C36        24  0.1667    0.20686    0.14533    0.07985   Biso 2.0        C
   C37        24  0.1667    0.11557    0.23627   -0.00551   Biso 2.0        C
   C38        24  0.1667   -0.00475    0.23249    0.1273    Biso 2.0        C
   C39        24  0.1667   -0.11727    0.23597    0.02091   Biso 2.0        C
   C40        24  0.1667   -0.03258    0.25542    0.04417   Biso 2.0        C
   C41        24  0.1667    0.0287     0.25844   -0.02125   Biso 2.0        C
   C42        24  0.1667   -0.1724     0.08001    0.18687   Biso 2.0        C
   C43        24  0.1667   -0.1417     0.15842    0.15696   Biso 2.0        C
   C44        24  0.1667   -0.05784    0.18432    0.18281   Biso 2.0        C
   C45        24  0.1667   -0.1724     0.18788    0.07823   Biso 2.0        C
   C46        24  0.1667    0.14908    0.19797   -0.08127   Biso 2.0        C
   C47        24  0.1667    0.21108    0.13329   -0.0771    Biso 2.0        C
   C48        24  0.1667    0.24168    0.10903    0.0049    Biso 2.0        C
   C49        24  0.1667    0.21074    0.07138   -0.14205   Biso 2.0        C
   C50        24  0.1667    0.08306    0.19459   -0.14259   Biso 2.0        C
   C51        24  0.1667    0.07722    0.12822   -0.20104   Biso 2.0        C
   C52        24  0.1667    0.14721    0.07091   -0.20478   Biso 2.0        C
   C53        24  0.1667    0.05772   -0.04277   -0.25774   Biso 2.0        C
   C54        24  0.1667    0.13547   -0.01621   -0.23112   Biso 2.0        C
   C55        24  0.1667   -0.15745    0.08849   -0.18821   Biso 2.0        C
   C56        24  0.1667   -0.08208    0.13647   -0.18939   Biso 2.0        C
   C57        24  0.1667   -0.00688    0.09872   -0.22681   Biso 2.0        C
   C58        24  0.1667   -0.01307    0.01601   -0.26001   Biso 2.0        C
   C59        24  0.1667    0.00782    0.23236   -0.10517   Biso 2.0        C
   C60        24  0.1667   -0.13775    0.21391   -0.06304   Biso 2.0        C
   C61        24  0.1667   -0.07332    0.20385   -0.12611   Biso 2.0        C
   C62        24  0.1667   -0.2102    -0.04652   -0.1541    Biso 2.0        C
   C63        24  0.1667   -0.1587     0.00208   -0.21381   Biso 2.0        C
   C64        24  0.1667   -0.08751   -0.03366   -0.24918   Biso 2.0        C
   C65        24  0.1667   -0.21033   -0.15399   -0.04578   Biso 2.0        C
   C66        24  0.1667   -0.1855    -0.12865   -0.12808   Biso 2.0        C
   C67        24  0.1667   -0.20958    0.15686   -0.05955   Biso 2.0        C
   C68        24  0.1667   -0.24757   -0.09606    0.01169   Biso 2.0        C
   C69        24  0.1667   -0.26161   -0.01045   -0.01085   Biso 2.0        C
   C70        24  0.1667   -0.24742    0.01143   -0.09662   Biso 2.0        C
   C71        24  0.1667   -0.21903    0.0961    -0.12016   Biso 2.0        C
   C72        24  0.1667   -0.21934   -0.11902    0.09657   Biso 2.0        C
   C73        24  0.1667   -0.20989   -0.05798    0.15692   Biso 2.0        C
   C74        24  0.1667   -0.22769    0.03001    0.13702   Biso 2.0        C
   C75        24  0.1667   -0.25146    0.05509    0.05425   Biso 2.0        C
   C76        24  0.1667   -0.22758    0.13769    0.02856   Biso 2.0        C
   C77        24  0.1667   -0.08772   -0.24905   -0.03199   Biso 2.0        C
   C78        24  0.1667   -0.15896   -0.21337    0.00334   Biso 2.0        C
   C79        24  0.1667   -0.15782   -0.18712    0.08956   Biso 2.0        C
   C80        24  0.1667   -0.06324   -0.12023   -0.22705   Biso 2.0        C
   C81        24  0.1667   -0.10926   -0.16687   -0.16592   Biso 2.0        C
   C82        24  0.1667   -0.06331   -0.22765   -0.11873   Biso 2.0        C
   Ce1         8  0.5       0.047(7)   0.047(7)   0.047(7)  Biso 100(19)    Ce
 
#======================================================================
 
# POWDER SPECIMEN AND EXPERIMENTAL DATA
 
data_RIETAN_p_01
 
_pd_block_id
      '2003-11-04|POWSET_01|..creator_name..|..instr_name..'
_pd_meas_datetime_initialed            '13 December 2002'
_pd_meas_info_author_name              'Yoshie Rikiishi'
_pd_meas_info_author_email             rikiishi@cc.okayama-u.ac.jp
_pd_meas_info_author_address       'Okayama University, Okayama 700-8530, Japan'

 
_pd_calc_method                       'Rietveld Refinement'
_diffrn_ambient_temperature           50K
_diffrn_ambient_environment           '1 bar (ambient pressure)'
_diffrn_source                        'X-ray'
_diffrn_source_type                   'Synchrotron radiation'
_diffrn_measurement_device_type       'Rididly Cylindrical IP'
_diffrn_detector                      'Imaging plate'
_diffrn_detector_type                 'Imaging plate'

_diffrn_radiation_wavelength         0.79970
_diffrn_radiation_monochromator      'Si(111) double monochromator'
 
_pd_meas_2theta_range_min        3.040    
_pd_meas_2theta_range_max        19.560   
_pd_meas_2theta_range_inc        0.040    
_pd_meas_number_of_points        414              
 
 
#======================================================================
 
# REFINEMENT DATA
 
_pd_proc_ls_special_details
;

_pd_proc_ls_profile_function      'Pseudo-voigt function'
_pd_proc_ls_background_function   'Legendre polynominal'

_pd_proc_ls_prof_R_factor         0.014      
_pd_proc_ls_prof_wR_factor        0.020      
_pd_proc_ls_prof_wR_expected      0.000      
 
_refine_ls_extinction_method        none
_refine_ls_number_parameters        24
_refine_ls_number_constraints       2          
;
